# Supplementary material
Source: ML conference proceedings conference paper supplement (https://openreview.net/forum?id=U6fp6IUBdr)
Supplement: supplementary_material [file attachment]

---

# Understanding Neural Network Binarization with Forward and Backward Proximal Quantizers

---

Anonymous Author(s)

Affiliation

Address

email

## Abstract

In neural network binarization, BinaryConnect (BC) and its variants are considered the standard. These methods apply the sign function in their forward pass and their respective gradients are backpropagated to update the weights. However, the derivative of the sign function is zero whenever defined, which consequently freezes training. Therefore, implementations of BC (e.g., BNN) usually replace the derivative of sign in the backward computation with identity or other *approximate gradient* alternatives. Although such practice works well empirically, it is largely a heuristic or “training trick.” We aim at shedding some light on these training tricks from the optimization perspective. Building from existing theory on ProxConnect (PC, a generalization of BC), we (1) equip PC with *different* forward-backward quantizers and obtain ProxConnect++ (PC++) that includes existing binarization techniques as special cases; (2) derive a principled way to synthesize forward-backward quantizers with automatic theoretical guarantees; (3) illustrate our theory by proposing an enhanced binarization algorithm BNN++; (4) conduct image classification experiments on CNNs and vision transformers, and empirically verify that BNN++ generally achieves competitive results on binarizing these models.

## 1 Introduction

The recent success of numerous applications in machine learning is largely fueled by training big models with billions of parameters, e.g., GPTs in large language models [7, 8], on extremely large datasets. However, as such models continue to scale up, end-to-end training or even fine-tuning becomes prohibitively expensive, due to the heavy amount of computation, memory and storage required. Moreover, even after successful training, deploying these models on resource-limited devices or environments that require real-time inference still poses significant challenges.

A common way to tackle the above problems is through model compression, such as pruning [36, 38, 41], reusing attention [6], weight sharing [45], structured factorization [39], and network quantization [16, 28, 29, 31]. Among them, network quantization (i.e., replacing full-precision weights with lower-precision ones) is a popular approach. In this work we focus on an extreme case of network quantization: binarization, i.e., constraining a subset of the weights to be only binary (i.e.,  $\pm 1$ ), with the benefit of much reduced memory and storage cost, as well as inference time through simpler and faster matrix-vector multiplications, which is one of the main computationally expensive steps in transformers and the recently advanced vision transformers [14, 30, 42].

For neural network binarization, BinaryConnect [BC, 11] is considered the de facto standard. BC applies the sign function to binarize the weights in the forward pass, and evaluates the gradient at

the binarized weights using the Straight Through Estimator [STE, 4]<sup>1</sup>. This widely adopted training trick has been formally justified from an optimization perspective: Dockhorn et al. [13], among others, identify BC as a nonconvex counterpart of dual averaging, which itself is a special case of the generalized conditional gradient algorithm. Dockhorn et al. [13] further propose ProxConnect (PC) as an extension of BC, by allowing arbitrary proximal quantizers (with sign being a special case) in the forward pass.

However, practical implementations [e.g., 2, 12, 21] usually apply an *approximate gradient* of the sign function on top of STE. For example, Hubara et al. [21] employ the hard tanh function as an approximator of sign. Thus, in the backward pass, the derivative of sign is approximated by the indicator function  $\mathbf{1}_{[-1,1]}$ , the derivative of hard tanh. Later, Darabi et al. [12] consider the sign-Swish function as a more accurate and flexible approximator in the backward pass (but still employs the sign in the forward pass).

Despite their excellent performance in practice, *approximate gradient* approaches cannot be readily understood in the PC framework of Dockhorn et al. [13], which does not equip any quantization in the backward pass. Thus, the main goal of this work is to further generalize PC and improve our understanding of approximate gradient approaches. Specifically, we introduce PC++ that comes with a *pair* of forward-backward proximal quantizers, and we show that most of the existing approximate gradient approaches are special cases of our proximal quantizers, and hence offering a formal justification of their empirical success from an optimization perspective. Moreover, inspired by our theoretical findings, we propose a novel binarization algorithm BNN++ that improves BNN+ [12] on both theoretical convergence properties and empirical performances. Notably, our work provides direct guidance on designing new forward-backward proximal quantizers in the PC++ family, with immediate theoretical guarantees while enabling streamlined implementation and comparison of a wide family of existing quantization algorithms.

Empirically, we benchmark existing PC++ algorithms (including the new BNN++) on image classification tasks on CNNs and vision transformers. Specifically, we perform weight (and activation) binarization on various datasets and models. Moreover, we explore the fully binarized scenario, where the dot-product accumulators are also quantized to 8-bit integers. In general, we observe that BNN++ is very competitive against existing approaches on most tasks, and achieves 30x reduction in memory and storage with a modest 5-10% accuracy drop compared to full precision training.

We summarize our main contributions in more detail:

- We generalize ProxConnect with forward-backward quantizers and introduce ProxConnect++ (PC++) that includes existing binarization techniques as special cases.
- We derive a principled way to synthesize forward-backward quantizers with theoretical guarantees. Moreover, we design a new BNN++ variant to illustrate our theoretical findings.
- We empirically compare different choices of forward-backward quantizers on image classification benchmarks, and confirm that BNN++ is competitive against existing alternatives.

## 2 Background

In neural network quantization, we aim at minimizing the usual (nonconvex) objective function  $\ell(\mathbf{w})$  with discrete weights  $\mathbf{w}$ :

$$\min_{\mathbf{w} \in Q} \ell(\mathbf{w}), \quad (1)$$

where  $Q \subseteq \mathbb{R}^d$  is a discrete, nonconvex quantization set such as  $Q = \{\pm 1\}^d$ . The acquired discrete weights  $\mathbf{w} \in Q$  are compared directly with continuous full precision weights, which we denote as  $\mathbf{w}^*$  for clarity. While our work easily extends to most discrete set  $Q$ , we focus on  $Q = \{\pm 1\}^d$  since this binary setting remains most challenging and leads to the most significant savings. Existing binarization schemes can be largely divided into the following two categories.

**Post-Training Binarization (PTB):** we can formulate post-training binarization schemes as the following standard forward and backward pass:

$$\mathbf{w}_t = \mathbf{P}_Q(\mathbf{w}_t^*), \quad \mathbf{w}_{t+1}^* = \mathbf{w}_t^* - \eta_t \tilde{\nabla} \ell(\mathbf{w}_t^*),$$

<sup>1</sup>Note that we refer to STE as its original definition by Bengio et al. [4] for binarizing weights, and other variants of STE (e.g., in BNN) as approximate gradient.

where  $\mathbf{P}_Q$  is the projector that binarizes the continuous weights  $\mathbf{w}^*$  deterministically (e.g., the sign function) or stochastically<sup>2</sup>, and  $\tilde{\nabla}\ell(\mathbf{w}_t^*)$  denotes a sample (sub)gradient of  $\ell$  at  $\mathbf{w}_t^*$ . We point out that PTB is merely a post-processing step, i.e., the binarized weights  $\mathbf{w}_t$  do not affect the update of the continuous weights  $\mathbf{w}_t^*$ , which are obtained through normal training. As a result, there is no guarantee that the acquired discrete weights  $\mathbf{w}_t$  is a good solution (either global or local) to eq. (1).

**Binarization-Aware Training (BAT):** we then recall the more difficult binarization-aware training scheme BinaryConnect (BC), first initialized by Courbariaux et al. [11]:

$$\mathbf{w}_t = \mathbf{P}_Q(\mathbf{w}_t^*), \quad \mathbf{w}_{t+1}^* = \mathbf{w}_t^* - \eta_t \tilde{\nabla}\ell(\mathbf{w}_t), \quad (2)$$

where we spot that the gradient is evaluated at the binarized weights  $\mathbf{w}_t$  but used to update the continuous weights  $\mathbf{w}_t^*$ . This approach is also known as Straight Through Estimator [STE, 4]. Note that it is also possible to update the binarized weights instead, effectively performing the proximal gradient algorithm to solve (1), as shown by Bai et al. [2]:

$$\mathbf{w}_t = \mathbf{P}_Q(\mathbf{w}_t^*), \quad \mathbf{w}_{t+1}^* = \mathbf{w}_t^* - \eta_t \tilde{\nabla}\ell(\mathbf{w}_t).$$

This method is known as ProxQuant, and will serve as a baseline in our experiments.

## 2.1 ProxConnect

Dockhorn et al. [13] proposed ProxConnect (PC) as a broad generalization of BinaryConnect in (2):

$$\mathbf{w}_t = \mathbf{P}_r^{\mu_t}(\mathbf{w}_t^*), \quad \mathbf{w}_{t+1}^* = \mathbf{w}_t^* - \eta_t \tilde{\nabla}\ell(\mathbf{w}_t), \quad (3)$$

where  $\mu_t := 1 + \sum_{\tau=1}^{t-1} \eta_\tau$ ,  $\eta_t > 0$  is the step size, and  $\mathbf{P}_r^{\mu_t}$  is the proximal quantizer:

$$\mathbf{P}_r^\mu(\mathbf{w}) := \underset{\mathbf{z}}{\operatorname{argmin}} \frac{1}{2\mu} \|\mathbf{w} - \mathbf{z}\|_2^2 + r(\mathbf{z}), \text{ and}$$

$$\mathcal{M}_r^\mu(\mathbf{w}) := \min_{\mathbf{z}} \frac{1}{2\mu} \|\mathbf{w} - \mathbf{z}\|_2^2 + r(\mathbf{z}).$$

In particular, when the regularizer  $r = \iota_Q$  (the indicator function of  $Q$ ),  $\mathbf{P}_r^{\mu_t} = \mathbf{P}_Q$  (for any  $\mu_t$ ) and we recover BC in (2). Dockhorn et al. [13] showed that the PC update (3) amounts to applying the generalized conditional gradient algorithm to a smoothened dual of the regularized problem:

$$\min_{\mathbf{w}} [\ell(\mathbf{w}) + r(\mathbf{w})] \approx \min_{\mathbf{w}^*} \ell^*(-\mathbf{w}^*) + \mathcal{M}_{r^*}^\mu(\mathbf{w}^*),$$

where  $f^*(\mathbf{w}^*) := \max_{\mathbf{w}} \langle \mathbf{w}, \mathbf{w}^* \rangle - f(\mathbf{w})$  is the Fenchel conjugate of  $f$ . The theory behind PC thus formally justifies STE from an optimization perspective. We provide a number of examples of the proximal quantizer  $\mathbf{P}_r^{\mu_t}$  in Appendix A.

Another natural cousin of PC is the reversed PC (rPC):

$$\mathbf{w}_t = \mathbf{P}_r^{\mu_t}(\mathbf{w}_t^*), \quad \mathbf{w}_{t+1}^* = \mathbf{w}_t^* - \eta_t \tilde{\nabla}\ell(\mathbf{w}_t^*),$$

which is able to exploit the rich landscape of the loss by evaluating the gradient at the continuous weights  $\mathbf{w}_t^*$ . Thus, we also include it as a baseline in our experiments.

We further discuss other related works in Appendix B.

## 3 Methodology

One popular heuristic to explain BC is through the following reformulation of problem (1):

$$\min_{\mathbf{w}^*} \ell(\mathbf{P}_Q(\mathbf{w}^*)).$$

Applying (stochastic) “gradient” to update the continuous weights we obtain:

$$\mathbf{w}_{t+1}^* = \mathbf{w}_t^* - \eta_t \cdot \mathbf{P}'_Q(\mathbf{w}_t^*) \cdot \tilde{\nabla}\ell(\mathbf{P}_Q(\mathbf{w}_t^*)).$$

<sup>2</sup>We only consider deterministic binarization in this paper.

Unfortunately, the derivative of the projector  $\mathbf{P}_Q$  is 0 everywhere except at the origin, where the derivative actually does not exist. BC [11], see (2), simply “pretended” that  $\mathbf{P}'_Q = I$ . Later works propose to replace the troublesome  $\mathbf{P}'_Q$  by the derivative of functions that approximate  $\mathbf{P}_Q$ , e.g., the hard tanh in BNN [21] and the sign-Swish in BNN+ [12]. Despite their empirical success, it is not clear what is the underlying optimization problem or if it is possible to also replace the projector inside  $\tilde{\nabla}\ell$ , i.e., allowing the algorithm to evaluate gradients at continuous weights, a clear advantage demonstrated by Bai et al. [2] and Dockhorn et al. [13]. Moreover, the theory established in PC, through a connection to the generalized conditional gradient algorithm, does not apply to these modifications yet, which is a gap that we aim to fill in this section.

### 3.1 ProxConnect++

To address the above-mentioned issues, we propose to study the following regularized problem:

$$\min_{\mathbf{w}^*} \ell(\mathbf{T}(\mathbf{w}^*)) + r(\mathbf{w}^*), \quad (4)$$

as a relaxation of the (equivalent) reformulation of (1):

$$\min_{\mathbf{w}^*} \ell(\mathbf{P}_Q(\mathbf{w}^*)) + \iota_Q(\mathbf{w}^*).$$

In other words,  $\mathbf{T} : \mathbb{R}^d \rightarrow \mathbb{R}^d$  is some transformation that approximates  $\mathbf{P}_Q$  and the regularizer  $r : \mathbb{R}^d \rightarrow \mathbb{R}$  approximates the indicator function  $\iota_Q$ . Directly applying ProxConnect in (3) we obtain<sup>3</sup>:

$$\mathbf{w}_t = \mathbf{P}_r^{\mu_t}(\mathbf{w}_t^*), \quad \mathbf{w}_{t+1}^* = \mathbf{w}_t^* - \eta_t \mathbf{T}'(\mathbf{w}_t) \cdot \tilde{\nabla} \ell(\mathbf{T}(\mathbf{w}_t)). \quad (5)$$

Introducing the forward and backward proximal quantizers:

$$\mathbf{F}_r^\mu := \mathbf{T} \circ \mathbf{P}_r^\mu, \quad \mathbf{B}_r^\mu := \mathbf{T}' \circ \mathbf{P}_r^\mu, \quad (6)$$

we can rewrite the update in (5) simply as:

$$\mathbf{w}_{t+1}^* = \mathbf{w}_t^* - \eta_t \cdot \mathbf{B}_r^{\mu_t}(\mathbf{w}_t^*) \cdot \tilde{\nabla} \ell(\mathbf{F}_r^{\mu_t}(\mathbf{w}_t^*)). \quad (7)$$

It is clear that the original ProxConnect corresponds to the special choice

$$\mathbf{F}_r^\mu = \mathbf{P}_r^\mu, \quad \mathbf{B}_r^\mu \equiv I.$$

Of course, one may now follow the recipe in (6) to design new forward-backward quantizers. We call this general formulation in (7) ProxConnect++ (PC++), which covers a broad family of algorithms.

Conversely, the complete characterization of proximal quantizers in Dockhorn et al. [13] allows us also to reverse engineer  $\mathbf{T}$  and  $r$  from manually designed forward and backward quantizers. As we will see, most existing forward-backward quantizers turn out to be special cases of our proximal quantizers, and thus their empirical success can be justified from an optimization perspective. Indeed, for simplicity, let us restrict all quantizers to univariate ones that apply component-wise. Then, the following result is proved in Appendix C.

**Theorem 1.** *A pair of forward-backward quantizers  $(\mathbf{F}, \mathbf{B})$  admits the decomposition in (6) (for some smoothing parameter  $\mu$  and regularizer  $r$ ) iff both  $\mathbf{F}$  and  $\mathbf{B}$  are functions of  $\mathbf{P}(w) := \int_{-\infty}^w \frac{1}{B(\omega)} dF(\omega)$ , which is proximal (i.e., monotone, compact-valued and with a closed graph).*

Importantly, with forward-backward proximal quantizers, the convergence results established by Dockhorn et al. [13] for PC directly carries over to PC++ (see Appendix C for details). Let us further illustrate the convenience of Theorem 1 by some examples.

**Example 1 (BNN).** *Hubara et al. [21] proposed BNN with the choice*

$$\mathbf{F} = \text{sign} \quad \text{and} \quad \mathbf{B} = \mathbf{1}_{[-1,1]},$$

which satisfies the decomposition in (6). Indeed, let

$$\mathbf{T}(w) = \min\{1, \max\{-1, w\}\}, \quad (8)$$

<sup>3</sup>We assume throughout that  $\mathbf{T}$ , and any function whose derivative we use, are locally Lipschitz so that their generalized derivative is always defined, see Rockafellar and Wets [40].

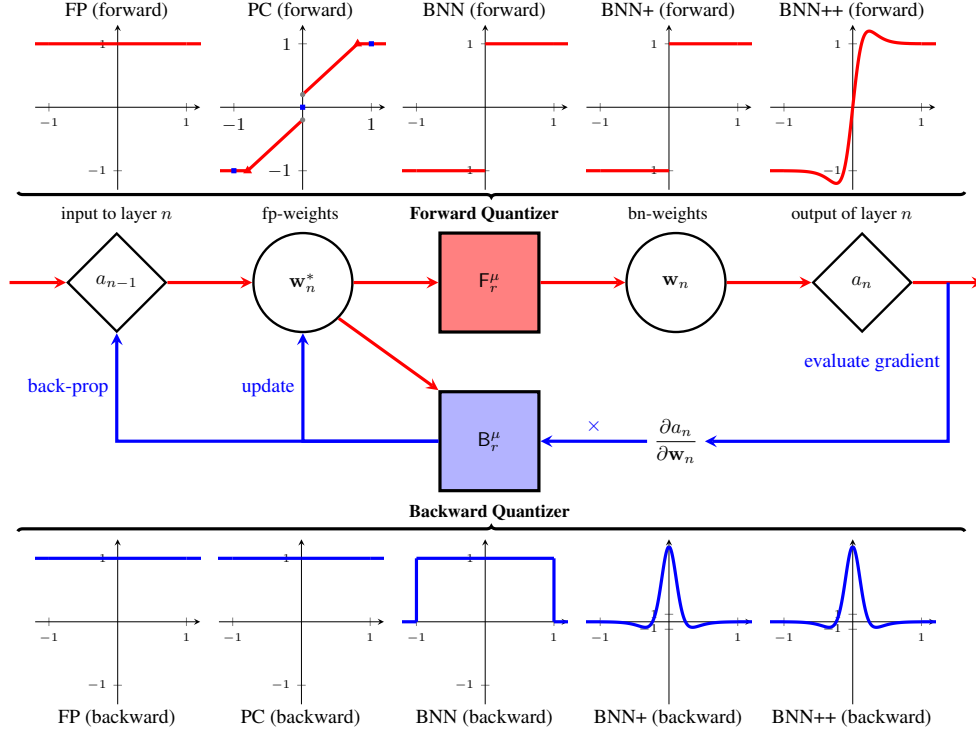

Figure 1: Forward and backward pass for ProxConnect++ algorithms (red/blue arrows indicate the forward/backward pass), where fp denotes full precision, bn denotes binary and back-prop denotes backpropagation.

$$\mathbf{P}_r^\mu(w) = \begin{cases} \frac{1}{\mu}w + \text{sign}(w)(1 - \frac{1}{\mu}), & \text{if } |w| > 1 \\ \text{sign}(w), & \text{if } |w| \leq 1 \end{cases}. \quad (9)$$

145 Since  $\mathbf{B}$  is constant over  $[-1, 1]$ , applying Theorem 1 we deduce that the proximal quantizer  $\mathbf{P}_r^\mu$ , if  
 146 exists, must coincide with  $\mathbf{F}$  over the support of  $\mathbf{B}$ . Applying monotonicity of  $\mathbf{P}_r^\mu$  we may complete  
 147 the reverse engineering by making the choice over  $|w| > 1$  as indicated above. We can easily verify  
 148 the decomposition in (6):

$$\mathbf{F} = \text{sign} = \mathbf{T} \circ \mathbf{P}_r^\mu, \quad \mathbf{B} = \mathbf{1}_{[-1,1]} = \mathbf{T}' \circ \mathbf{P}_r^\mu.$$

149 Thus, BNN is exactly BinaryConnect applied to the transformed problem in (4), where the transfor-  
 150 mation  $\mathbf{T}$  is the so-called hard tanh in (8) while the regularizer  $r$  is determined (implicitly) by the  
 151 proximal quantizer  $\mathbf{P}_r^\mu$  in (9).

152 To our best knowledge, this is the first time the (regularized) objective function that BNN aims to  
 153 optimize has been identified. The convergence properties of BNN hence follow from the general  
 154 result of Dockhorn et al. [13] on ProxConnect, see Appendix C.

155 **Example 2 (BNN+).** Darabi et al. [12] adopted the derivative of the sign-Swish (SS) function as a  
 156 backward quantizer while retaining the sign function as the forward quantizer:

$$\mathbf{B}(\mathbf{w}) = \nabla \text{SS}(\mathbf{w}) := \mu[1 - \frac{\mu\mathbf{w}}{2} \tanh(\frac{\mu\mathbf{w}}{2})] \tanh'(\frac{\mu\mathbf{w}}{2}), \quad \mathbf{F} = \text{sign},$$

157 where  $\mu$  is a hyperparameter that controls how well SS approximates the sign. Applying Theorem 1  
 158 we find that the derivative of SS (as backward) coupled with the sign (as forward) do not admit the  
 159 decomposition in (6), for any regularizer  $r$ . Thus, we are not able to find the (regularized) objective  
 160 function (if it exists) underlying BNN+.

161 We conclude that BNN+ cannot be justified under the framework of PC++. However, it is possible to  
 162 design a variant of BNN+ that does belong to the PC++ family and hence enjoys the accompanying  
 163 theoretical properties:

Table 1: Variants of ProxConnect++.

| Forward Quantizer | Backward Quantizer    | Algorithm |
|-------------------|-----------------------|-----------|
| identity          | identity              | FP        |
| $\mathbf{P}_Q$    | identity              | BC        |
| $\mathbf{L}_\rho$ | identity              | PC        |
| $\mathbf{P}_Q$    | $\mathbf{1}_{[-1,1]}$ | BNN       |
| $\mathbf{P}_Q$    | $\nabla\text{SS}$     | BNN+      |
| SS                | $\nabla\text{SS}$     | BNN++     |

**Example 3 (BNN++).** We propose that a simple fix of BNN+ would be to replace its sign forward quantizer with the sign-Swish (SS) function:

$$F(\mathbf{w}) = \text{SS}(\mathbf{w}) := \frac{\mu\mathbf{w}}{2} \tanh'(\frac{\mu\mathbf{w}}{2}) + \tanh(\frac{\mu\mathbf{w}}{2}),$$

which is simply the primitive of B. In this case, the algorithm simply reduces to PC++ applied on (4) with  $r = 0$  (and hence essentially stochastic gradient descent). Of course, we could also compose with a proximal quantizer to arrive at the pair  $(F \circ \mathbf{P}_r^\mu, B \circ \mathbf{P}_r^\mu)$ , which effectively reduces to PC++ applied on the regularized objective in (4) with a nontrivial  $r$ . We call this variant BNN++.

We will demonstrate in the next section that BNN++ is more desirable than BNN+ empirically.

In summary: (1) ProxConnect++ enables us to design forward-backward quantizers with infinite many choices of  $T$  and  $r$ , (2) it also allows us to reverse engineer  $T$  and  $r$  from existing forward-backward quantizers, which helps us to better understand existing practices, (3) with our theoretical tool, we design a new BNN++ algorithm, which enjoys immediate convergences properties. Figure 1 visualizes ProxConnect++ with a variety of forward-backward quantizers.

## 4 Experiments

In this section, we perform extensive experiments to benchmark PC++ on CNN backbone models and the recently advanced vision transformer architectures in three settings: (a) binarizing weights only (BW); (b) binarizing weights and activations (BWA), where we simply apply a similar forward-backward proximal quantizer to the activations; and (c) binarizing weights, activations, with 8-bit dot-product accumulators (BWAA) [35].

### 4.1 Experimental settings

**Datasets:** We perform image classification on CIFAR-10/100 datasets [25] and ImageNet-1K dataset [26]. Additional details on our experimental setting can be found in Appendix D.

**Backbone architectures:** (1) *CNNs*: we evaluate CIFAR-10 classification using ResNet20 [18], and ImageNet-1K with ResNet-50 [18]. We consider both fine-tuning and end-to-end training; (2) *Vision transformers*: we further evaluate our algorithm on two popular vision transformer models: ViT [14] and DeiT [42]. For ViT, we consider ViT-B model and fine-tuning task across all models<sup>4</sup>. For DeiT, we consider DeiT-B, DeiT-S, and DeiT-T, which consist of 12, 6, 3 building blocks and 768, 384 and 192 embedding dimensions, respectively; we consider fine-tuning task on ImageNet-1K pre-trained model for CIFAR datasets and end-to-end training on ImageNet-1K dataset.

**Baselines:** For ProxConnect++, we consider the 6 variants in Table 1. With different choices of the forward quantizer  $F_r^\mu$  and the backward quantizer  $B_r^\mu$ , we include the full precision (FP) baseline and 5 binarization methods: BinaryConnect (BC) [11], ProxConnect (PC) [13], Binary Neural Network (BNN) [21], the original BNN+ [12], and the modified BNN++ with  $F_r^\mu = \text{SS}$ . Note that we linearly increase  $\mu$  in BNN++ to achieve full binarization in the end. We also compare ProxConnect++ with the ProxQuant and reverseProxConnect baselines.

**Hyperparameters:** We apply the same training hyperparameters and fine-tune/end-to-end training for 100/300 epochs across all models. For binarization methods: (1) PQ (ProxQuant): similar to Bai et al. [2], we apply the LinearQuantizer (LQ), see (10) in Appendix A, with initial  $\rho_0 = 0.01$

<sup>4</sup>Note that we use pre-trained models provided by Dosovitskiy et al. [14] on the ImageNet-21K/ImageNet-1K for fine-tuning ViT-B model on the ImageNet-1K/CIFAR datasets, respectively.

Table 2: Binarizing weights (BW), binarizing weights and activation (BWA) and binarizing weights, activation, with 8-bit accumulators (BWAA) on CNN backbones. We consider the fine-tuning (FT) pipeline and the end-to-end (E2E) pipeline. We compare five variants of ProxConnect++ (BC, PC, BNN, BNN+, and BNN++) with FP, PQ, and rPC. For the end-to-end pipeline, we omit the results for BWAA due to training divergence and report the mean of three runs with different random seeds.

| Dataset     | Pipeline | Task | FP     | PQ     | rPC    | ProxConnect++ |        |        |        |               |
|-------------|----------|------|--------|--------|--------|---------------|--------|--------|--------|---------------|
|             |          |      |        |        |        | BC            | PC     | BNN    | BNN+   | BNN++         |
| CIFAR-10    | FT       | BW   | 92.01% | 89.94% | 89.98% | 90.31%        | 90.31% | 90.35% | 90.27% | <b>90.40%</b> |
|             |          | BWA  | 92.01% | 88.79% | 83.55% | 89.39%        | 89.95% | 90.01% | 89.99% | <b>90.22%</b> |
|             |          | BWAA | 92.01% | 85.39% | 81.10% | 89.11%        | 89.21% | 89.32% | 89.55% | <b>90.01%</b> |
|             | E2E      | BW   | 92.01% | 81.59% | 81.82% | 87.51%        | 88.05% | 89.92% | 89.39% | <b>90.03%</b> |
|             |          | BWA  | 92.01% | 81.51% | 81.60% | 86.99%        | 87.26% | 89.15% | 89.02% | <b>89.91%</b> |
|             |          |      |        |        |        |               |        |        |        |               |
| ImageNet-1K | FT       | BW   | 78.87% | 66.77% | 69.22% | 71.35%        | 71.29% | 71.41% | 70.22% | <b>72.33%</b> |
|             |          | BWA  | 78.87% | 56.21% | 58.19% | 65.99%        | 65.61% | 66.02% | 65.22% | <b>68.03%</b> |
|             |          | BWAA | 78.87% | 53.29% | 55.28% | 58.18%        | 59.21% | 59.77% | 59.10% | <b>63.02%</b> |
|             | E2E      | BW   | 78.87% | 63.23% | 66.39% | 67.45%        | 67.51% | 67.49% | 66.99% | <b>68.11%</b> |
|             |          | BWA  | 78.87% | 61.19% | 64.17% | 65.42%        | 65.31% | 65.29% | 65.98% | <b>66.08%</b> |
|             |          |      |        |        |        |               |        |        |        |               |

and linearly increase to  $\rho_T = 10$ ; (2) rPC (reverseProxConnect): we use the same LQ for rPC; (3) ProxConnect++: for PC, we apply the same LQ; for BNN+, we choose  $\mu = 5$  (no need to increase  $\mu$  as the forward quantizer is sign); for BNN++, we choose  $\mu_0 = 5$  and linearly increase to  $\mu_T = 30$  to achieve binarization at the final step.

Across all the experiments with random initialization, we report the mean of three runs with different random seeds. Furthermore, we provide the complete results with error bars in Appendix F.

## 4.2 CNN as backbone

We first compare PC++ against baseline methods on various tasks employing CNNs:

(1) Binarizing weights only (BW), where we simply binarize the weights and keep the other components (i.e., activations and accumulations) in full precision.

(2) Binarizing weights and activations (BWA), while keeping accumulation in full precision. Similar to the weights, we apply the same forward-backward proximal quantizer to binarize activations.

(3) Binarizing weights, activations, with 8-bit accumulators (BWAA). BWAA is more desirable in certain cases where the network bandwidth is narrow, e.g., in homomorphic encryption. To achieve BWAA, in addition to quantizing the weights and activations, we follow the implementation of WrapNet [35] and quantize the accumulation of each layer with an additional cyclic function. In practice, we find that with 1-bit weights and activations, the lowest bits we can successfully employ to quantize accumulation is 8, while any smaller choice would raise a high overflow rate and cause the network to diverge. Moreover, BWAA highly relies on a good initialization and cannot be successfully trained end-to-end in our evaluation (and hence omitted).

Note that for the fine-tuning pipeline, we initialize the model with their corresponding pre-trained full precision weights. For the end-to-end pipeline, we utilize random initialization. We report our results in Table 2 and observe: (1) the PC family outperforms baseline methods (i.e., PQ and rPC), and achieves competitive performance on both small and larger scale datasets; (2) BNN++ performs consistently better and is more desirable among the five variants of PC++, especially on BWA and BWAA tasks. Its advantage over BNN+ further validates our theoretical guidance.

## 4.3 Vision transformer as backbone

Next, we perform similar experiments on the three tasks on vision transformers.

**Implementation on vision transformers:** While network binarization is popular for CNNs, its application for vision transformers is still rare<sup>5</sup>. Here we apply four protocols for implementation:

<sup>5</sup>Notably, Y. He et al. [19] also consider binarizing vision transformers, which we compare our implementation details and experimental results against in Appendix E.

Table 3: Our results on binarizing vision transformers (binarizing weights only). We compare five variants of ProxConnect++ (BC, PC, BNN, BNN+, and BNN++) with FP, PQ, and rPC. End-to-end training tasks are marked as **bold** (i.e., ImageNet-1K for DeiT-T/S/B), where the results are the mean of three runs with different random seeds.

| Model  | Dataset     | FP     | PQ     | rPC    | ProxConnect++ |               |        |        |               |
|--------|-------------|--------|--------|--------|---------------|---------------|--------|--------|---------------|
|        |             |        |        |        | BC            | PC            | BNN    | BNN+   | BNN++         |
| ViT-B  | CIFAR-10    | 98.13% | 85.07% | 86.21% | 87.97%        | 90.13%        | 89.07% | 88.13% | <b>90.22%</b> |
|        | CIFAR-100   | 87.13% | 72.09% | 73.51% | 76.35%        | 78.13%        | 77.22% | 77.11% | <b>79.21%</b> |
|        | ImageNet-1K | 77.91% | 57.66% | 55.31% | 63.23%        | <b>66.33%</b> | 65.33% | 63.53% | <b>66.33%</b> |
| DeiT-T | CIFAR-10    | 94.85% | 82.77% | 82.25% | 83.09%        | 85.15%        | 86.11% | 85.92% | <b>86.40%</b> |
|        | CIFAR-100   | 72.37% | 54.53% | 55.67% | 59.66%        | 60.15%        | 60.04% | 59.78% | <b>60.33%</b> |
|        | ImageNet-1K | 72.20% | 61.23% | 60.36% | 63.23%        | 66.15%        | 64.99% | 66.67% | <b>67.32%</b> |
| DeiT-S | CIFAR-10    | 95.09% | 81.66% | 80.23% | 84.85%        | 85.13%        | 85.09% | 85.16% | <b>86.17%</b> |
|        | CIFAR-100   | 73.19% | 45.57% | 46.66% | 60.11%        | 61.59%        | 60.55% | 60.15% | <b>62.99%</b> |
|        | ImageNet-1K | 79.90% | 69.88% | 68.75% | 73.16%        | <b>73.51%</b> | 73.77% | 73.25% | <b>73.51%</b> |
| DeiT-B | CIFAR-10    | 98.72% | 85.21% | 86.35% | 88.97%        | 90.53%        | 90.21% | 89.03% | <b>90.66%</b> |
|        | CIFAR-100   | 86.66% | 72.11% | 73.39% | 75.39%        | <b>78.55%</b> | 76.22% | 76.51% | 78.29%        |
|        | ImageNet-1K | 81.80% | 72.53% | 70.11% | 76.55%        | 76.61%        | 75.59% | 76.63% | <b>76.72%</b> |

Table 4: Results on binarizing vision transformers (BW, BWA, and BWAA) on DeiT-T. We compare 5 variants of ProxConnect++ (BC, PC, BNN, BNN+, and BNN++) with FP, PQ, and rPC. End-to-end training tasks are marked as **bold** (i.e., ImageNet-1K), where we omit the results for BWAA due to training divergence and the reported results are the mean of 3 runs with different random seeds.

| Dataset     | Task | FP     | PQ     | rPC    | ProxConnect++ |        |        |        |               |
|-------------|------|--------|--------|--------|---------------|--------|--------|--------|---------------|
|             |      |        |        |        | BC            | PC     | BNN    | BNN+   | BNN++         |
| CIFAR-10    | BW   | 94.85% | 82.77% | 82.25% | 83.09%        | 85.15% | 86.11% | 85.92% | <b>86.40%</b> |
|             | BWA  | 94.85% | 82.56% | 82.02% | 82.89%        | 85.01% | 85.99% | 85.66% | <b>86.12%</b> |
|             | BWAA | 94.85% | 81.34% | 80.97% | 82.08%        | 84.31% | 84.87% | 84.72% | <b>85.31%</b> |
| CIFAR-100   | BW   | 72.37% | 54.53% | 55.67% | 59.66%        | 60.15% | 60.04% | 59.78% | <b>60.33%</b> |
|             | BWA  | 72.37% | 53.77% | 54.98% | 59.21%        | 59.71% | 59.66% | 59.12% | <b>59.85%</b> |
|             | BWAA | 72.37% | 52.15% | 54.36% | 58.15%        | 59.01% | 58.72% | 58.15% | <b>59.06%</b> |
| ImageNet-1K | BW   | 72.20% | 61.23% | 60.36% | 63.23%        | 66.15% | 64.99% | 66.67% | <b>67.32%</b> |
|             | BWA  | 72.20% | 60.01% | 58.77% | 62.13%        | 65.29% | 63.75% | 65.29% | <b>65.65%</b> |

- (1) We keep the mean  $s_n$  of full precision weights  $\mathbf{w}_n^*$  for each layer  $n$  as a scaling factor (can be thus absorbed into  $F_r^{\mu_t}$ ) for the binary weights  $\mathbf{w}_n$ . Such an approach keeps the range of  $\mathbf{w}_n$  during binarization and significantly reduces training difficulty without additional computation.
- (2) For binarized vision transformer models, LayerNorm is important to avoid gradient explosion. Thus, we add one more LayerNorm layer at the end of each attention block.
- (3) When fine-tuning a pre-trained model (full precision), the binarized vision transformer usually suffers from a bad initialization. Thus, a few epochs of pre-training on the binarized vision transformer is extremely helpful and can make fine-tuning much more efficient and effective.
- (4) We apply the knowledge distillation technique in BiBERT [37] to boost the performance. We use full precision pre-trained models as the teacher model.

**Main Results:** We report the main results of binarizing vision transformers in Table 3 (BW) and Table 4 (BW, BWA, BWAA), where we compare ProxConnect++ algorithms with the FP, PQ, and rPC baselines on fine-tuning and end-to-end training tasks. We observe that: (1) ProxConnect++ variants generally outperform PQ and rPC and are able to binarize vision transformers with less than 10% accuracy degradation on the BW task. In particular, for end-to-end training, the best performing ProxConnect++ algorithms achieve  $\approx 5\%$  accuracy drop; (2) Among the five variants, we confirm BNN++ is also generally better overall for vision transformers. This provides evidence

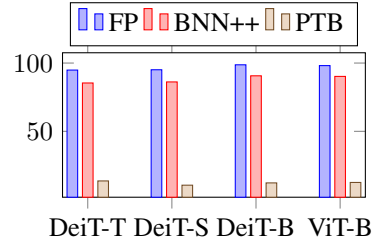

Figure 2: Comparison between Full Precision (FP) model, BNN++, and Post-training Binarization (PTB) on the fine-tuning task on CIFAR-10.



Table 5: Ablation study on the effect of the scaling factor, normalization, pre-training, and knowledge distillation. Experiments are performed on CIFAR-10 with ViT-B.

| Method | Scaling | Normalization | Pre-train | KD | Accuracy |
|--------|---------|---------------|-----------|----|----------|
| PC     | ✗       | ✗             | ✗         | ✗  | 0.10%    |
|        | ✓       | ✗             | ✗         | ✗  | 12.81%   |
|        | ✓       | ✓             | ✗         | ✗  | 66.51%   |
|        | ✓       | ✓             | ✓         | ✗  | 88.53%   |
|        | ✓       | ✓             | ✓         | ✓  | 90.13%   |
| BNN++  | ✗       | ✗             | ✗         | ✗  | 1.50%    |
|        | ✓       | ✗             | ✗         | ✗  | 23.55%   |
|        | ✓       | ✓             | ✗         | ✗  | 77.22%   |
|        | ✓       | ✓             | ✓         | ✗  | 89.05%   |
|        | ✓       | ✓             | ✓         | ✓  | 90.22%   |

that our Theorem 1 allows practitioners to easily design many and choose the one that performs best empirically; (3) With a clear underlying optimization objective, BNN++ again outperforms BNN+ across all tasks, which empirically verifies our theoretical findings on vision transformers; (4) In general, we find that weight binarization achieves about 30x reduction in memory footprint, e.g., from 450 MB to 15 MB for ViT-B.

**Ablation Studies:** We provide further ablation studies to gain more insights and verify our binarization protocols for vision transformers.

(1) Post-training Binarization: in Figure 2, we verify the difference between PTB (post-training binarization) and BAT (binarization-aware training) on the fine-tuning task on CIFAR-10 across different models. Note that we use BNN++ as a demonstration of BAT. We observe that without optimization during fine-tuning, the PTB approach fails in general, thus confirming the importance of considering BAT for vision transformers.

(2) Effect of binarizing protocols: here we show the effect of the four binarizing protocols mentioned at the beginning, including scaling the binarized weights using the mean of full precision weights (scaling), adding additional LayerNorm layers (normalization), BAT on the full precision pre-trained models (pre-train) and knowledge distillation. We report the results in Table 5 and confirm that each protocol is essential to binarize vision transformers successfully.

(3) Which block should one binarize: lastly, we visualize the sensitivity of each building block to binarization in vision transformers (i.e., ViT-B) on CIFAR-10 in Figure 3. We observe that binarizing blocks near the head and the tail of the architecture causes a significant accuracy drop.

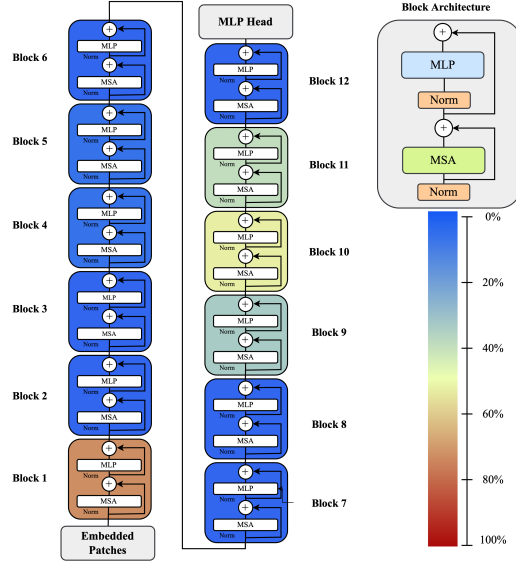

Figure 3: Results of binarizing different components (blocks) of ViT-B architecture on CIFAR-10. Warmer color indicates significant accuracy degradation after binarization.

## 5 Conclusion

In this work we study the popular *approximate gradient* approach in neural network binarization. By generalizing ProxConnect and proposing PC++, we provide a principled way to understand forward-backward quantizers and cover most existing binarization techniques as special cases. Furthermore, PC++ enables us to easily design the desired quantizers (e.g., the new BNN++) with automatic theoretical guarantees. We apply PC++ to CNNs and vision transformers and compare its variants in extensive experiments. We confirm empirically that PC++ overall achieves competitive results, whereas BNN++ is generally more desirable. Limitations and broader impacts are addressed in Appendix G.

## References

- [1] M. Alizadeh, A. Behboodi, M. van Baalen, C. Louizos, T. Blankevoort, and M. Welling. “Gradient L1 Regularization for Quantization Robustness”. arXiv e-prints. 2020.
- [2] Y. Bai, Y.-X. Wang, and E. Liberty. “ProxQuant: Quantized Neural Networks via Proximal Operators”. In: *International Conference on Learning Representations*. 2018.
- [3] R. Banner, Y. Nahshan, and D. Soudry. “Post training 4-bit quantization of convolutional networks for rapid-deployment”. In: *Advances in Neural Information Processing Systems*. 2019, pp. 7948–7956.
- [4] Y. Bengio, N. Léonard, and A. Courville. “Estimating or propagating gradients through stochastic neurons for conditional computation”. arXiv preprint arXiv:1308.3432. 2013.
- [5] Y. Bhalgat, J. Lee, M. Nagel, T. Blankevoort, and N. Kwak. “LSQ+: Improving low-bit quantization through learnable offsets and better initialization”. In: *IEEE/CVF Conference on Computer Vision and Pattern Recognition (CVPR) Workshops*. 2020, pp. 2978–2985.
- [6] S. Bhojanapalli, A. Chakrabarti, A. Veit, M. Lukasik, H. Jain, F. Liu, Y.-W. Chang, and S. Kumar. “Leveraging redundancy in attention with Reuse Transformers”. arXiv preprint arXiv:2110.06821. 2021.
- [7] S. Biderman et al. “Pythia: A suite for analyzing large language models across training and scaling”. arXiv preprint arXiv:2304.01373 (2023).
- [8] T. Brown et al. “Language models are few-shot learners”. *Advances in neural information processing systems*, vol. 33 (2020), pp. 1877–1901.
- [9] Y. Cai, Z. Yao, Z. Dong, A. Gholami, M. W. Mahoney, and K. Keutzer. “Zeroq: A novel zero shot quantization framework”. In: *Proceedings of the IEEE/CVF Conference on Computer Vision and Pattern Recognition*. 2020, pp. 13169–13178.
- [10] J. Choi, Z. Wang, S. Venkataramani, P. I.-J. Chuang, V. Srinivasan, and K. Gopalakrishnan. “Pact: Parameterized clipping activation for quantized neural networks”. arXiv preprint arXiv:1805.06085. 2018.
- [11] M. Courbariaux, Y. Bengio, and J.-P. David. “Binaryconnect: Training deep neural networks with binary weights during propagations”. In: *Advances in Neural Information Processing Systems*. 2015.
- [12] S. Darabi, M. Belbahri, M. Courbariaux, and V. P. Nia. “Regularized binary network training”. In: *NeurIPS Workshop on Energy Efficient Machine Learning and Cognitive Computing*. 2019.
- [13] T. Dockhorn, Y. Yu, E. Sari, M. Zolnouri, and V. Partovi Nia. “Demystifying and Generalizing BinaryConnect”. In: *Advances in Neural Information Processing Systems*. 2021, pp. 13202–13216.
- [14] A. Dosovitskiy et al. “An image is worth 16x16 words: Transformers for image recognition at scale”. In: *International Conference on Learning Representations*. 2021.
- [15] S. K. Esser, J. L. McKinstry, D. Bablani, R. Appuswamy, and D. S. Modha. “Learned step size quantization”. arXiv preprint arXiv:1902.08153. 2019.
- [16] A. Ghaffari, M. S. Tahaei, M. Tayaranian, M. Asgharian, and V. P. Nia. “Is Integer Arithmetic Enough for Deep Learning Training?” In: *Advances in Neural Information Processing Systems*. 2022.
- [17] S. Gupta, A. Agrawal, K. Gopalakrishnan, and P. Narayanan. “Deep Learning with Limited Numerical Precision”. In: *Proceedings of the 32nd International Conference on Machine Learning (ICML)*. 2015, pp. 1737–1746.
- [18] K. He, X. Zhang, S. Ren, and J. Sun. “Deep residual learning for image recognition”. In: *Proceedings of the IEEE conference on computer vision and pattern recognition*. 2016, pp. 770–778.
- [19] Y. He, Z. Lou, L. Zhang, W. Wu, B. Zhuang, and H. Zhou. “BiViT: Extremely Compressed Binary Vision Transformer”. arXiv preprint arXiv:2211.07091. 2022.
- [20] Z. Hou and S.-Y. Kung. “Multi-Dimensional Model Compression of Vision Transformer”. arXiv preprint arXiv:2201.00043. 2021.
- [21] I. Hubara, M. Courbariaux, D. Soudry, R. El-Yaniv, and Y. Bengio. “Binarized neural networks”. In: *Advances in Neural Information Processing Systems*. 2016.

- [22] B. Jacob, S. Kligys, B. Chen, M. Zhu, M. Tang, A. Howard, H. Adam, and D. Kalenichenko. “Quantization and Training of Neural Networks for Efficient Integer-Arithmetic-Only Inference”. In: *IEEE Conference on Computer Vision and Pattern Recognition (CVPR)*. 2018.
- [23] S. R. Jain, A. Gural, M. Wu, and C. H. Dick. “Trained quantization thresholds for accurate and efficient fixed-point inference of deep neural networks”. arXiv preprint arXiv:1903.08066. 2019.
- [24] S. Jung, C. Son, S. Lee, J. Son, J.-J. Han, Y. Kwak, S. J. Hwang, and C. Choi. “Learning to quantize deep networks by optimizing quantization intervals with task loss”. In: *Proceedings of the IEEE Conference on Computer Vision and Pattern Recognition*. 2019, pp. 4350–4359.
- [25] A. Krizhevsky. “Learning multiple layers of features from tiny images”. Tech. rep. University of Toronto, 2009.
- [26] A. Krizhevsky, I. Sutskever, and G. E. Hinton. “Imagenet classification with deep convolutional neural networks”. In: *Advances in Neural Information Processing Systems*. 2012, pp. 1097–1105.
- [27] Y. Li, R. Gong, X. Tan, Y. Yang, P. Hu, Q. Zhang, F. Yu, W. Wang, and S. Gu. “BRECQ: Pushing the Limit of Post-Training Quantization by Block Reconstruction”. In: *International Conference on Learning Representations*. 2021.
- [28] Z. Li, T. Yang, P. Wang, and J. Cheng. “Q-ViT: Fully Differentiable Quantization for Vision Transformer”. arXiv preprint arXiv:2201.07703. 2022.
- [29] Y. Lin, T. Zhang, P. Sun, Z. Li, and S. Zhou. “FQ-ViT: Fully Quantized Vision Transformer without Retraining”. arXiv preprint arXiv:2111.13824. 2021.
- [30] Z. Liu, Y. Lin, Y. Cao, H. Hu, Y. Wei, Z. Zhang, S. Lin, and B. Guo. “Swin transformer: Hierarchical vision transformer using shifted windows”. In: *Proceedings of the IEEE/CVF International Conference on Computer Vision*. 2021.
- [31] Z. Liu, Y. Wang, K. Han, W. Zhang, S. Ma, and W. Gao. “Post-training quantization for vision transformer”. *Advances in Neural Information Processing Systems* (2021), pp. 28092–28103.
- [32] C. Louizos, M. Reisser, T. Blankevoort, E. Gavves, and M. Welling. “Relaxed Quantization for Discretized Neural Networks”. In: *International Conference on Learning Representations (ICLR)*. 2019.
- [33] M. Nagel, R. A. Amjad, M. Van Baalen, C. Louizos, and T. Blankevoort. “Up or down? Adaptive rounding for post-training quantization”. In: *International Conference on Machine Learning*. 2020, pp. 7197–7206.
- [34] M. Nagel, M. v. Baalen, T. Blankevoort, and M. Welling. “Data-free quantization through weight equalization and bias correction”. In: *Proceedings of the IEEE International Conference on Computer Vision*. 2019, pp. 1325–1334.
- [35] R. Ni, H.-m. Chu, O. Castañeda Fernández, P.-y. Chiang, C. Studer, and T. Goldstein. “Wrapnet: Neural net inference with ultra-low-precision arithmetic”. In: *International Conference on Learning Representations ICLR 2021*. OpenReview. 2021.
- [36] B. Pan, R. Panda, Y. Jiang, Z. Wang, R. Feris, and A. Oliva. “IA-RED<sup>2</sup>: Interpretability-Aware Redundancy Reduction for Vision Transformers”. In: *Advances in Neural Information Processing Systems*. 2021, pp. 24898–24911.
- [37] H. Qin, Y. Ding, M. Zhang, Q. Yan, A. Liu, Q. Dang, Z. Liu, and X. Liu. “Bibert: Accurate fully binarized bert”. arXiv preprint arXiv:2203.06390. 2022.
- [38] Y. Rao, W. Zhao, B. Liu, J. Lu, J. Zhou, and C.-J. Hsieh. “Dynamicvit: Efficient vision transformers with dynamic token sparsification”. In: *Advances in Neural Information Processing Systems*. 2021, pp. 13937–13949.
- [39] H. Ren, H. Dai, Z. Dai, M. Yang, J. Leskovec, D. Schuurmans, and B. Dai. “Combiner: Full attention transformer with sparse computation cost”. *Advances in Neural Information Processing Systems* (2021), pp. 22470–22482.
- [40] R. T. Rockafellar and R. J.-B. Wets. “Variational Analysis”. Springer, 1998.

- 387 [41] M. S. Ryoo, A. Piergiovanni, A. Arnab, M. Dehghani, and A. Angelova. “TokenLearner: What Can 8  
388 Learned Tokens Do for Images and Videos?” arXiv preprint arXiv:2106.11297. 2021.
- 389 [42] H. Touvron, M. Cord, M. Douze, F. Massa, A. Sablayrolles, and H. Jégou. “Training data-efficient image  
390 transformers & distillation through attention”. In: *International Conference on Machine Learning*. 2021.
- 391 [43] P. Wang, Q. Chen, X. He, and J. Cheng. “Towards accurate post-training network quantization via bit-  
392 split and stitching”. In: *International Conference on Machine Learning*. 2020, pp. 9847–9856.
- 393 [44] S. Xu, Y. Li, T. Ma, B. Zeng, B. Zhang, P. Gao, and J. Lu. “TerViT: An Efficient Ternary Vision Trans-  
394 former”. arXiv preprint arXiv:2201.08050. 2022.
- 395 [45] J. Zhang, H. Peng, K. Wu, M. Liu, B. Xiao, J. Fu, and L. Yuan. “MiniViT: Compressing Vision Trans-  
396 formers with Weight Multiplexing”. In: *IEEE/CVF Conference on Computer Vision and Pattern Recog-  
397 nition*. 2022, pp. 12145–12154.
- 398 [46] X. Zhao, Y. Wang, X. Cai, C. Liu, and L. Zhang. “Linear symmetric quantization of neural networks for  
399 low-precision integer hardware”. In: *International Conference on Learning Representations*. 2019.

## Appendix for *Understanding Neural Network Binarization with Forward and Backward Proximal Quantizers*

### A More on Proximal Quantizers

Dockhorn et al. [13] gave a complete characterization of the proximal quantizer  $\mathbf{P}_r$ : a (multi-valued) mapping  $\mathbf{P}$  is a proximal quantizer (of some underlying regularizer  $r$ ) iff it is monotone, compact-valued and with a closed graph. We now give a few examples to illustrate the ubiquity of proximal quantizers, as well as the generality of PC:

- Identity function: apparently, choosing  $\mathbf{P}_r^{\mu_t}$  as the identity function recovers the full precision training.
- $\mathbf{P}_r^{\mu_t} = \mathbf{P}_Q$ : as  $Q = \{\pm 1\}$ , this choice recovers exactly BC in (2).
- $\mathbf{P}_r^{\mu_t} = \mathbf{L}_\rho^\varrho$ : This is the general piecewise linear quantizer designed by Dockhorn et al. [13]. Recall that  $Q = \{q_k\}_{k=1}^2$ , where  $q_1 = -1, q_2 = +1$ , such that  $p_2 = 0$  is the middle point. By introducing two parameters  $\rho, \varrho \geq 0$ , we can define two shifts:

$$\begin{aligned} \text{horizontal: } q_1^- &= q_1, q_1^+ = p_2 \wedge (q_1 + \rho) \\ q_2^- &= p_2 \vee (q_2 - \rho), q_2^+ = q_2 \\ \text{vertical: } p_2^- &= q_1 \vee (p_2 - \varrho), p_2^+ = q_2 \wedge (p_2 + \varrho). \end{aligned}$$

Then, we define  $\mathbf{L}_\rho^\varrho$  as the piece-wise linear map (that simply connects the points by straight lines):

$$\mathbf{L}_\rho^\varrho(w^*) = \begin{cases} q_1, & \text{if } q_1^- \leq w^* \leq q_1^+ \\ q_1 + (w^* - q_1^+) \frac{p_2^- - q_1^+}{p_2^- - q_1^+}, & \text{if } q_1^+ \leq w^* < p_2^- \\ p_2^+ + (w^* - p_2^-) \frac{q_2 - p_2^+}{q_2 - p_2^-}, & \text{if } p_2^- < w^* \leq q_2^- \\ q_2, & \text{if } q_2^- \leq w^* \leq q_2^+ \end{cases} \quad (10)$$

For the middle points,  $\mathbf{L}_\rho^\varrho(w^*)$  can be regarded as the intermediate state between the identity function and  $\mathbf{P}_Q$  such that, where  $\mathbf{L}_\rho^\varrho(w^*)$  may take any value within the two limits. Note that  $\rho$  controls the discretization vicinity, such that in practice,  $\rho$  is linearly increased over time to fulfill binary weights in the end. We visualize examples of  $\mathbf{L}_\rho^\varrho(w^*)$  in Figure 4.

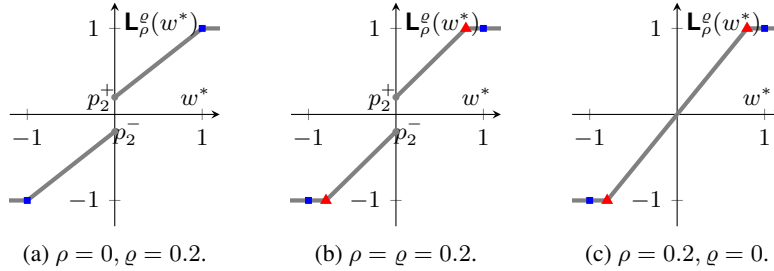

Figure 4: Different instantiations of the proximal map  $\mathbf{L}_\rho^\varrho$  in (10) for  $Q = \{-1, 1\}$ .

### B Related works

**Vision Transformer.** In computer vision, vision transformers have become one of the most popular backbone architectures. Dosovitskiy et al. [14] is the first to modify the transformer model to enable images as input, namely the ViT model. Specifically, Dosovitskiy et al. [14] translates an image to a sequence of flattened image patches as input, and applies a self-attention mechanism to retrieve patch-wise information in the feature representation. Touvron et al. [42] further equips ViT with knowledge distillation and proposes DeiT that generalizes well on smaller models and datasets. Liu et al. [30] further proposes Swin as a hierarchical vision transformer that computes representation with shifted windows.

In vision transformers, the main computation overhead is the multi-head attention layer, whose cost is quadratic with the length of the image patches. As a result, such models are in general expensive to train. To reduce the computational cost, different compression techniques have been explored. For instance, Pan et al. [36] performs dynamic pruning for less important patches; Bhojanapalli et al. [6] reuses attention scores computed for one layer in multiple building blocks; Hou and Kung [20] applies multi-dimensional model compression. In this paper, we focus on an alternative approach, namely network quantization.

**Network Quantization.** We consider two possible scenarios of network quantization:

(1) Post-training Quantization: We first discuss the easier post-training quantization methods. Such approaches usually quantize the full-precision pre-trained model and directly apply it for inference. Post-training quantization is widely used in CNNs [1, 3, 9, 27, 33, 34, 43]. Liu et al. [31] is the first to explore PTQ for vision transformers. It optimizes the quantization intervals and considers ranking information in the loss function. However, it only considers quantization to a 6-bit model without severe performance degradation. For lower-bit quantization, it is essential to leverage training.

(2) Quantization-Aware Training (QAT): different from post-training quantization, quantization-aware training leverage quantization during pre-training or fine-tuning. Thus it can be formulated as an optimization problem for learning the optimal quantized weights [5, 10, 15, 17, 22–24, 32, 46]. Compared with PTQ, QAT can obtain less accuracy drop in low-bit quantization compared to the full-precision model. Z. Li et al. [28] and Xu et al. [44] demonstrate that QAT requires a unique design to quantize vision transformers and it is possible to perform quantization to 3 bit without severe performance degradation. [19] further performs binarization with softmax-aware binarization and information preservation.

## C Additional Theoretical Results

**Theorem 1.** A pair of forward-backward quantizers  $(F, B)$  admits the decomposition in (6) (for some smoothing parameter  $\mu$  and regularizer  $\tau$ ) iff both  $F$  and  $B$  are functions of  $\mathbf{P}(w) := \int_{-\infty}^w \frac{1}{B(\omega)} dF(\omega)$ , which is proximal (i.e., monotone, compact-valued and with a closed graph).

*Proof.* We first recall the decomposition in (6):

$$F_r^\mu := T \circ \mathbf{P}_r^\mu, \quad B_r^\mu := T' \circ \mathbf{P}_r^\mu. \quad (19)$$

Suppose first that  $(F, B)$  satisfies the above decomposition. Clearly, both  $F$  and  $B$  are functions of  $\mathbf{P} = \mathbf{P}_r^\mu$ . Moreover,

$$\frac{F'(\omega)}{B(\omega)} = \frac{\mathbf{P}_r^{\mu'}(\omega) \cdot T' \circ \mathbf{P}_r^\mu}{T' \circ \mathbf{P}_r^\mu} = \mathbf{P}_r^{\mu'}(\omega)$$

and thus

$$\int_{-\infty}^w \frac{1}{B(\omega)} dF(\omega) = \mathbf{P}_r^\mu(w) - \mathbf{P}_r^\mu(-\infty),$$

which is clearly proximal.

Conversely, let  $\mathbf{P}(w) := \int_{-\infty}^w \frac{1}{B(\omega)} dF(\omega)$  be proximal. Taking (generalized) derivative we obtain

$$\mathbf{P}'(\omega) = \frac{F'(\omega)}{B(\omega)}.$$

Since  $B$  is a function of  $\mathbf{P}$ , say  $B = T' \circ \mathbf{P}$ , performing integration we obtain

$$F = T \circ \mathbf{P},$$

up to some immaterial constant (that can be absorbed into  $T$ ). Thus,  $(F, B)$  satisfies the decomposition (6).  $\square$

The following convergence guarantee for PC++ follows directly from the results in Dockhorn et al. [13]:

465 **Theorem 2.** Fix any  $\mathbf{w}$ , the iterates in (7) satisfy:

$$\sum_{\tau=s}^t \eta_\tau [\langle \mathbf{w}_\tau - \mathbf{w}, \tilde{\nabla} \ell(\mathbf{T} \mathbf{w}_\tau) \rangle + r(\mathbf{w}_\tau) - r(\mathbf{w})] \leq \Delta_{s-1}(\mathbf{w}) - \Delta_t(\mathbf{w}) + \sum_{\tau=s}^t \Delta_\tau(\mathbf{w}_\tau), \quad (11)$$

466 where  $\Delta_\tau(\mathbf{w}) := r_\tau(\mathbf{w}) - r_\tau(\mathbf{w}_{\tau+1}) - \langle \mathbf{w} - \mathbf{w}_{\tau+1}, \mathbf{w}_{\tau+1}^* \rangle$  is the Bregman divergence induced by  
 467 the (possibly nonconvex) function  $r_\tau(\mathbf{w}) := \mu_{\tau+1} \cdot r(\mathbf{w}) + \frac{1}{2} \|\mathbf{w}\|_2^2$ . (Recall that  $\mu_t := 1 + \sum_{\tau=1}^{t-1} \eta_\tau$ .)

468 The summand on the left-hand side of (11) is related to the duality gap, which is a natural measure  
 469 of stationarity for the nonconvex problem (4). Indeed, it reduces to the familiar ones when convexity  
 470 is present:

471 **Theorem 3.** For convex  $\ell \circ \mathbf{T}$  and any  $\mathbf{w}$ , the iterates in (7) satisfy:

$$\min_{\tau=s, \dots, t} \mathbb{E}[f(\mathbf{w}_\tau) - f(\mathbf{w})] \leq \frac{1}{\sum_{\tau=s}^t \eta_\tau} \cdot \mathbb{E}[\Delta_{s-1}(\mathbf{w}) - \Delta_t(\mathbf{w}) + \sum_{\tau=s}^t \Delta_\tau(\mathbf{w}_\tau)]. \quad (12)$$

472 If  $r$  is also convex, then

$$\min_{\tau=s, \dots, t} \mathbb{E}[f(\mathbf{w}_\tau) - f(\mathbf{w})] \leq \frac{1}{\sum_{\tau=s}^t \eta_\tau} \cdot \mathbb{E}[\Delta_{s-1}(\mathbf{w}) + \sum_{\tau=s}^t \frac{\eta_\tau^2}{2} \|\tilde{\nabla} \ell(\mathbf{w}_\tau)\|_2^2], \quad (13)$$

473 and

$$\mathbb{E}[f(\bar{\mathbf{w}}_t) - f(\mathbf{w})] \leq \frac{1}{\sum_{\tau=s}^t \eta_\tau} \cdot \mathbb{E}[\Delta_{s-1}(\mathbf{w}) + \sum_{\tau=s}^t \frac{\eta_\tau^2}{2} \|\tilde{\nabla} \ell(\mathbf{w}_\tau)\|_2^2], \quad (14)$$

474 where  $\bar{\mathbf{w}}_t = \frac{\sum_{\tau=s}^t \eta_\tau \mathbf{w}_\tau}{\sum_{\tau=s}^t \eta_\tau}$ , and  $f := \ell \circ \mathbf{T} + r$  is the regularized and transformed objective.

475 The right-hand sides of (13) and (14) diminish iff  $\eta_t \rightarrow 0$  and  $\sum_t \eta_t = \infty$  (assuming boundedness of  
 476 the stochastic gradient). We note some trade-off in choosing the step size  $\eta_\tau$ : both the numerator and  
 477 denominator of the right-hand sides of (13) and (14) are increasing w.r.t.  $\eta_\tau$ . The same conclusion  
 478 can be drawn for (12) and (11), where  $\Delta_\tau$  also depends on  $\eta_\tau$  (through the accumulated magnitude  
 479 of  $\mathbf{w}_{\tau+1}^*$ ).

## 480 D Additional Experimental Settings

481 **Hardware and package:** All experiments were run on a GPU cluster with NVIDIA V100 GPUs.  
 482 The platform we use is PyTorch. Specifically, we apply ViT and DeiT models implemented in  
 483 Pytorch Image Models (timm)<sup>6</sup>.

484 **Pre-trained models:** In this work, we applied pre-trained full precision models for fine-tuning  
 485 tasks. Here we specify the links to the models we used (note that we choose patch size equal to 16  
 486 across all models):

- 487 • ViT-B (ImageNet-1K): [https://storage.googleapis.com/vit\\_models/augreg/B\\_16-i21k-300ep-lr\\_0.001-aug\\_medium1-wd\\_0.1-do\\_0.0-sd\\_0.0--imagenet2012-steps\\_20k-lr\\_0.01-res\\_224.npz](https://storage.googleapis.com/vit_models/augreg/B_16-i21k-300ep-lr_0.001-aug_medium1-wd_0.1-do_0.0-sd_0.0--imagenet2012-steps_20k-lr_0.01-res_224.npz);
- 488 • ViT-B (ImageNet-21K): [https://storage.googleapis.com/vit\\_models/augreg/B\\_16-i21k-300ep-lr\\_0.001-aug\\_medium1-wd\\_0.1-do\\_0.0-sd\\_0.0.npz](https://storage.googleapis.com/vit_models/augreg/B_16-i21k-300ep-lr_0.001-aug_medium1-wd_0.1-do_0.0-sd_0.0.npz);
- 489 • DeiT-T (ImageNet-1K): [https://dl.fbaipublicfiles.com/deit/deit\\_tiny\\_patch16\\_224-a1311bcf.pth](https://dl.fbaipublicfiles.com/deit/deit_tiny_patch16_224-a1311bcf.pth);
- 490 • DeiT-S (ImageNet-1K): [https://dl.fbaipublicfiles.com/deit/deit\\_small\\_patch16\\_224-cd65a155.pth](https://dl.fbaipublicfiles.com/deit/deit_small_patch16_224-cd65a155.pth);
- 491 • DeiT-B (ImageNet-1K): [https://dl.fbaipublicfiles.com/deit/deit\\_base\\_patch16\\_224-b5f2ef4d.pth](https://dl.fbaipublicfiles.com/deit/deit_base_patch16_224-b5f2ef4d.pth).

<sup>6</sup><https://timm.fast.ai/>

Table 6: Error bar for binarizing weights (BW), binarizing weights and activation (BWA) and binarizing weights, activation, with 8-bit accumulators (BWAA) on CNN backbones. We consider the end-to-end (E2E) pipeline. We compare five variants of ProxConnect++ (BC, PC, BNN, BNN+, and BNN++) with FP, PQ, and rPC. For the end-to-end pipeline, we report the mean of three runs with different random seeds.

| Dataset     | Task | FP              | PQ              | rPC             | ProxConnect++   |                 |                 |                 |                        |
|-------------|------|-----------------|-----------------|-----------------|-----------------|-----------------|-----------------|-----------------|------------------------|
|             |      |                 |                 |                 | BC              | PC              | BNN             | BNN+            | BNN++                  |
| CIFAR-10    | BW   | 92.01%<br>±0.19 | 81.59%<br>±0.11 | 81.82%<br>±0.16 | 87.51%<br>±0.07 | 88.05%<br>±0.05 | 89.92%<br>±0.11 | 89.39%<br>±0.13 | <b>90.03%</b><br>±0.06 |
|             | BWA  | 92.01%<br>±0.13 | 81.51%<br>±0.16 | 81.60%<br>±0.09 | 86.99%<br>±0.11 | 87.26%<br>±0.23 | 89.15%<br>±0.08 | 89.02%<br>±0.16 | <b>89.91%</b><br>±0.09 |
| ImageNet-1K | BW   | 78.87%<br>±0.06 | 63.23%<br>±0.11 | 66.39%<br>±0.22 | 67.45%<br>±0.04 | 67.51%<br>±0.09 | 67.49%<br>±0.12 | 66.99%<br>±0.26 | <b>68.11%</b><br>±0.02 |
|             | BWA  | 78.87%<br>±0.18 | 61.19%<br>±0.22 | 64.17%<br>±0.19 | 65.42%<br>±0.22 | 65.31%<br>±0.17 | 65.29%<br>±0.21 | 65.98%<br>±0.15 | <b>66.08%</b><br>±0.13 |

Table 7: Error bar on binarizing vision transformers (BW and BWA). We consider the end-to-end (E2E) pipeline. We compare five variants of ProxConnect++ (BC, PC, BNN, BNN+, and BNN++) with FP, PQ, and rPC. The results are the mean of three runs with different random seeds.

| Model  | Task | FP              | PQ              | rPC             | ProxConnect++   |                        |                 |                 |                        |
|--------|------|-----------------|-----------------|-----------------|-----------------|------------------------|-----------------|-----------------|------------------------|
|        |      |                 |                 |                 | BC              | PC                     | BNN             | BNN+            | BNN++                  |
| DeiT-T | BW   | 72.20%<br>±0.11 | 61.23%<br>±0.07 | 60.36%<br>±0.19 | 63.23%<br>±0.21 | 66.15%<br>±0.11        | 64.99%<br>±0.15 | 66.67%<br>±0.09 | <b>67.32%</b><br>±0.07 |
|        | BWA  | 72.20%<br>±0.13 | 60.01%<br>±0.12 | 58.77%<br>±0.08 | 62.13%<br>±0.06 | 65.29%<br>±0.19        | 63.75%<br>±0.18 | 65.29%<br>±0.06 | <b>65.65%</b><br>±0.03 |
| DeiT-S | BW   | 79.90%<br>±0.21 | 69.88%<br>±0.26 | 68.75%<br>±0.16 | 73.16%<br>±0.19 | <b>73.51%</b><br>±0.22 | 73.77%<br>±0.08 | 73.25%<br>±0.11 | <b>73.51%</b><br>±0.13 |
| DeiT-B | BW   | 81.80%<br>±0.17 | 72.53%<br>±0.15 | 70.11%<br>±0.23 | 76.55%<br>±0.07 | 76.61%<br>±0.24        | 75.59%<br>±0.17 | 76.63%<br>±0.13 | <b>76.72%</b><br>±0.07 |

## E Comparison with BiViT

Y. He et al. [19] propose BiViT, which considers the same binarization task on vision transformers (specifically, Swin-T and NesT-T). Y. He et al. [19] follow a different implementation with softmax-aware binarization and information preservation. To fairly compare with this work, we follow the same setting and run PC++ on Swin-T and NesT-T on ImageNet-1K. We observe that BNN++ achieves 71.3% Top-1 accuracy (BiViT:70.8%) and 69.3% Top-1 accuracy (BiViT:68.7%) respectively on Swin-T and NesT-T. Note that BiViT simply applies BNN as the main algorithm and may be further improved with PC++ algorithms.

## F Additional results for end-to-end training

Finally, we provide the error bars for our main experiments in Table 6 and Table 7 for CNN backbones and vision transformer backbones, respectively.

## G Broader Impacts and Limitations

We anticipate our work to further enable training and deploying advanced machine learning models to resource limited devices and environments, and help reducing energy consumption and carbon footprint at large. We do not foresee any direct negative societal impact.

One limitation we hope to address in the future is to build a theoretical framework that will allow practitioners to quickly evaluate different forward-backward quantizers for a variety of applications.
